# Supplementary material
Source: Springer Nature journal article supplement (https://www.springermedizin.de/resource/supplementary/12889_2010_2431_MOESM1_ESM.pdf/9485820)
Supplement: MOESM1 [file 9485820]

Nationally representative sample of municipalities supplemented by a representative sample of schools in the two largest cities in Denmark, Copenhagen and Aarhus

**Baseline**

4,265 students at 134 schools in 244 school classes were invited in the school year 1996/97

**Baseline**

3,458 students participated  
Response rate 81%  
(3458/4265)

**Follow-up**

2,880 agreed to be contacted again  
  
2,815 were identified in the personal registry

**Follow-up**

1,760 participated in the follow-up in 2003  
  
Response rate 63 %  
(1,760/ 2,815)

104 had missing data on at least one of the variables used for the analysis

**Analytical sample**

**n = 1,656**

Had information on BMI at baseline and follow-up and were included in the analysis regarding change in BMI

**n = 1,402**

Were normal weight at baseline and were included in the analysis regarding the development of overweight
